# Supplementary material
Source: PubMed Central journal article supplement (PMC7833326)
Supplement: mmc1.pdf [file mmc1.pdf]

# THE LANCET

## Global Health

### Supplementary appendix

This appendix formed part of the original submission and has been peer reviewed. We post it as supplied by the authors.

Supplement to: Kumari V, Mehta K, Choudhary R. COVID-19 outbreak and decreased hospitalisation of pregnant women in labour. *Lancet Glob Health* 2020; published online July 14. [http://dx.doi.org/10.1016/S2214-109X\(20\)30319-3](http://dx.doi.org/10.1016/S2214-109X(20)30319-3).

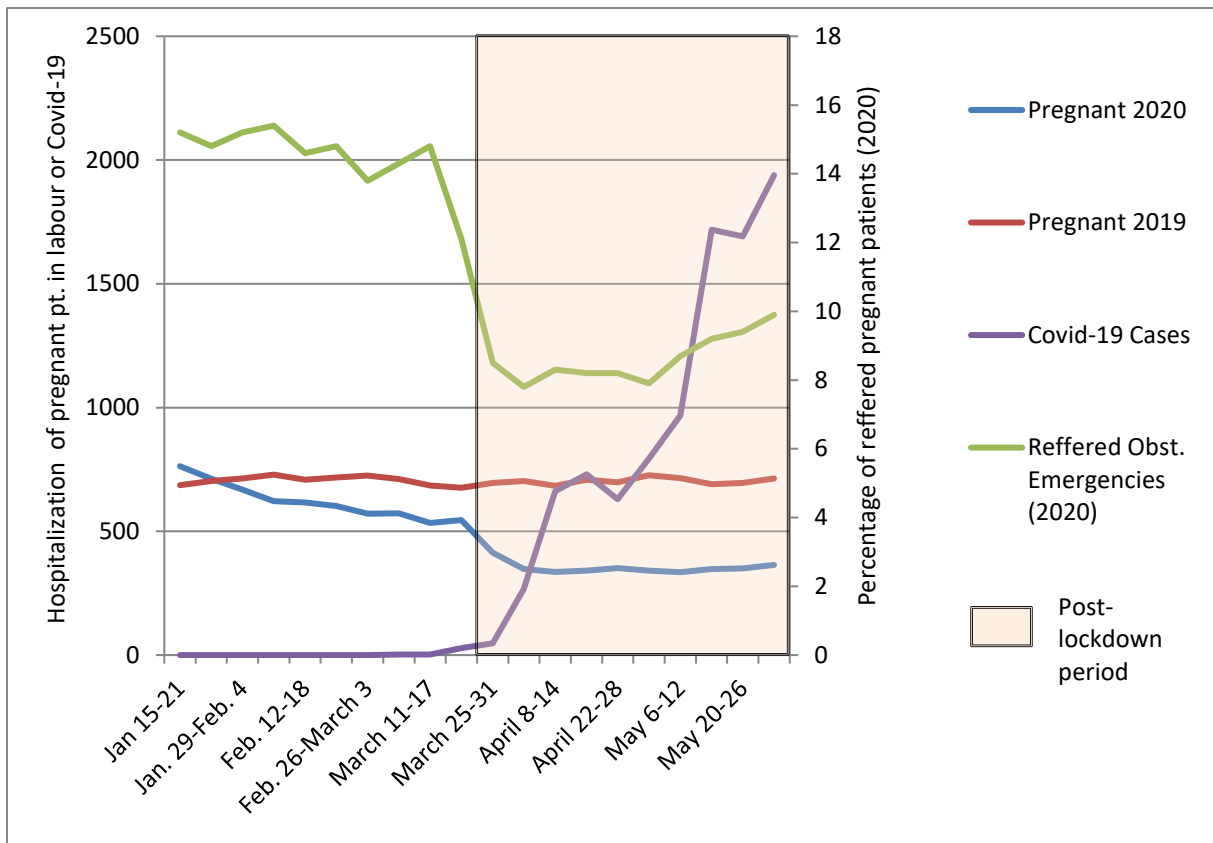

Figure 1. Hospitalization of pregnant women before and during the Lockdown for Covid-19 Pandemic in 2020 and during the Same Period in 2019, Relative to the Incidence of Hospitalization for Covid-19. Weeks in 2020, starting ten weeks before and ending ten weeks after March 25<sup>th</sup>. Data from four hospitals in an integrated tertiary care medical College in Western India. Lockdown was imposed on March 25, 2020; right half of figure (shaded part) shows the post-lockdown period. The data shown in blue are weekly admissions of pregnant pts during period from January 15 through June 2, 2020. The data shown in green are weekly proportion of referred obstetric emergencies admitted during period from January 15 through June 2, 2020. The data shown in red same are weekly admissions for January 15 through June 2, 2019. The data shown in purple are the number of hospitalization with a diagnosis of Covid-19.
